# Supplementary material for: ESBL/AmpC-Producing Escherichia coli in Wild Boar: Epidemiology and Risk Factors
Source: MDPI journal article supplement (doi:10.3390/ani11071855), 2021-06-22
Supplement: s1 [file s1]

Table S1: PCR gene targets, thermal profiles and primer sequences used for the detection of ESBL and AmpC *E. coli*.

| Target                           | Thermal profile                                    |      | Sequence (5'-3')                                                                                            | Reference            |
|----------------------------------|----------------------------------------------------|------|-------------------------------------------------------------------------------------------------------------|----------------------|
| <i>bla</i> <sub>CTX-M-1</sub>    | 94°C for 5 min                                     |      | F: AAAAATCACTGCGCCAGTTC<br>R: AGCTTATTCATCGCCACGTT                                                          |                      |
| <i>bla</i> <sub>CTX-M-2</sub>    | 94°C for 25 s                                      |      | F: CGACGCTACCCCTGCTATT                                                                                      |                      |
|                                  | 52°C for 40 s                                      |      | R: CCAGCGTCAGATTTTTCAGG                                                                                     |                      |
| <i>bla</i> <sub>CTX-M-9</sub>    | 72°C for 50 s                                      | X 30 | F: CAAAGAGAGTGCAACGGATG<br>R: ATTGGAAAGCGTTCATCACC                                                          | Woodford et al. 2005 |
| <i>bla</i> <sub>CTX-M-8/25</sub> | 72°C for 6 min                                     |      | F: TCGCGTTAAGCGGATGATGC (group 8)<br>F: GCACGATGACATTCGGG (group 25)<br>R: AACCCACGATGTGGGTAGC (group 8/25) |                      |
|                                  | 94°C for 2 min                                     |      |                                                                                                             |                      |
| <i>bla</i> <sub>SHV</sub>        | 94°C for 30 s<br>60°C for 30 s<br>72°C for 1 min   | X 30 | F: TTATCTCCCTGTTAGCACC<br>R: GATTGCTGATTTCGCTCGG                                                            | Arlet et al. 1997    |
|                                  | 72°C for 4 min                                     |      |                                                                                                             |                      |
|                                  | 95°C for 5 min                                     |      |                                                                                                             |                      |
| <i>bla</i> <sub>TEM</sub>        | 94°C for 30 sec<br>42°C for 2 min<br>72°C for 45 s | X 35 | F: ATAAAATTCTTGAAGAC<br>R: TTACCAATGCTTAATCA                                                                | Mabilat et al. 1990  |
|                                  | 72°C for 5 min                                     |      |                                                                                                             |                      |
|                                  | 94°C for 3 min                                     |      |                                                                                                             |                      |
| <i>bla</i> <sub>CMY</sub>        | 94°C for 1 min<br>58°C for 1 min<br>72°C for 1 min | X 25 | F: TGATGAAAAAATCGTTATGCTGC<br>R: GCTTTTCAAGAATGCGCCAGG                                                      | Dierikx et al. 2010  |
|                                  | 72°C for 10 min                                    |      |                                                                                                             |                      |

Table S2: Prevalence of *bla*<sub>CMY</sub> of *E. coli* isolated from wild boar by sex, age class, hunting season and hunting area.

| Factors          |           | Positive | Total | Prevalence % | 95% C.I.*  |
|------------------|-----------|----------|-------|--------------|------------|
| Sex              | Female    | 4        | 802   | 0.50         | 0.14–1.27  |
|                  | Male      | 9        | 702   | 1.28         | 0.59–2.42  |
| Age class        | Young     | 4        | 345   | 1.16         | 0.32–2.94  |
|                  | Sub-adult | 1        | 368   | 0.27         | 0.01–1.50  |
|                  | Adult     | 8        | 791   | 1.01         | 0.44–1.98  |
| Hunting season   | 2017-2018 | 4        | 525   | 0.76         | 0.21–1.94  |
|                  | 2018-2019 | 3        | 381   | 0.79         | 0.16–2.28  |
|                  | 2019-2020 | 6        | 598   | 1.00         | 0.37–2.17  |
| Hunting district | HD 1      | 6        | 506   | 1.19         | 0.44–2.56  |
|                  | HD 2      | 0        | 63    | 0.00         | 0.00–5.57  |
|                  | HD 3      | 3        | 79    | 3.80         | 0.79–10.70 |
|                  | HD 4      | 4        | 856   | 0.47         | 0.13–1.19  |

\*confidence interval.

Table S3: Prevalence of *bla*<sub>SHV</sub> of *E. coli* isolated from wild boar by sex, age class, hunting season and hunting area.

| Factors        |           | Positive | Total | Prevalence % | 95% C.I.* |
|----------------|-----------|----------|-------|--------------|-----------|
| Sex            | Female    | 4        | 802   | 0.50         | 0.14–1.27 |
|                | Male      | 3        | 702   | 0.43         | 0.09–1.24 |
| Age class      | Young     | 1        | 345   | 0.29         | 0.01–1.60 |
|                | Sub-adult | 3        | 368   | 0.82         | 0.17–2.36 |
|                | Adult     | 3        | 791   | 0.38         | 0.08–1.10 |
| Hunting season | 2017-2018 | 6        | 525   | 1.14         | 0.42–2.47 |
|                | 2018-2019 | 1        | 381   | 0.26         | 0.01–1.45 |
|                | 2019-2020 | 0        | 598   | 0.00         | 0.00–0.06 |
| Hunting area   | HA 1      | 4        | 506   | 0.79         | 0.22–2.01 |
|                | HA 2      | 0        | 63    | 0.00         | 0.00–5.69 |
|                | HA 3      | 0        | 79    | 0.00         | 0.00–4.56 |
|                | HA 4      | 3        | 856   | 0.35         | 0.07–1.02 |

\*confidence interval.
